# Supplementary material for: Cacalol and cacalol acetate as photoproducers of singlet oxygen and as free radical scavengers, evaluated by EPR spectroscopy and TBARS
Source: Royal Society of Chemistry journal article supplement (doi:10.1039/c3ra42848f), 2013-11-06
Supplement: c3ra42848f.pdf [file c3ra42848f.pdf]

## SUPPORTING INFORMATION FOR:

# **Cacalol and Cacalol acetate as photoproducers of singlet oxygen and as free radical scavengers, evaluated by EPR spectroscopy and TBARS**

Virginia Gómez-Vidales,<sup>a\*</sup> Gilma Granados-Oliveros,<sup>a,b</sup> Antonio Nieto-Camacho,<sup>a</sup>  
Mirna Reyes-Solís,<sup>a</sup> Manuel Jiménez-Estrada<sup>a</sup>

<sup>a</sup> Instituto de Química, Universidad Nacional Autónoma de México, Circuito exterior, Ciudad Universitaria, Coyoacán, D.F., C.P. 04510. México.

<sup>b</sup> GIADS, Facultad de Química Ambiental, Universidad Santo Tomás de Aquino, Bucaramanga, Colombia.

\* Corresponding author: Tel. 52 55 56224617, Fax 52 55 5616 22 17. E-mail address: [gomvidal@unam.mx](mailto:gomvidal@unam.mx) (Virginia Gómez)

## List of Contents:

### Figures:

Figure A<sub>1</sub> UV-vis spectra for Cacalol and Cacalol acetate

### Appendices:

#### **Additional details of the EPR measurements**

A1.1 Quantum Yield for the production of Singlet Oxygen

A1.2 Flux of Absorbed Photons.

A2. Characterization of Compounds

**Figure A1 UV-vis spectra for Cacalol and Cacalol acetate**

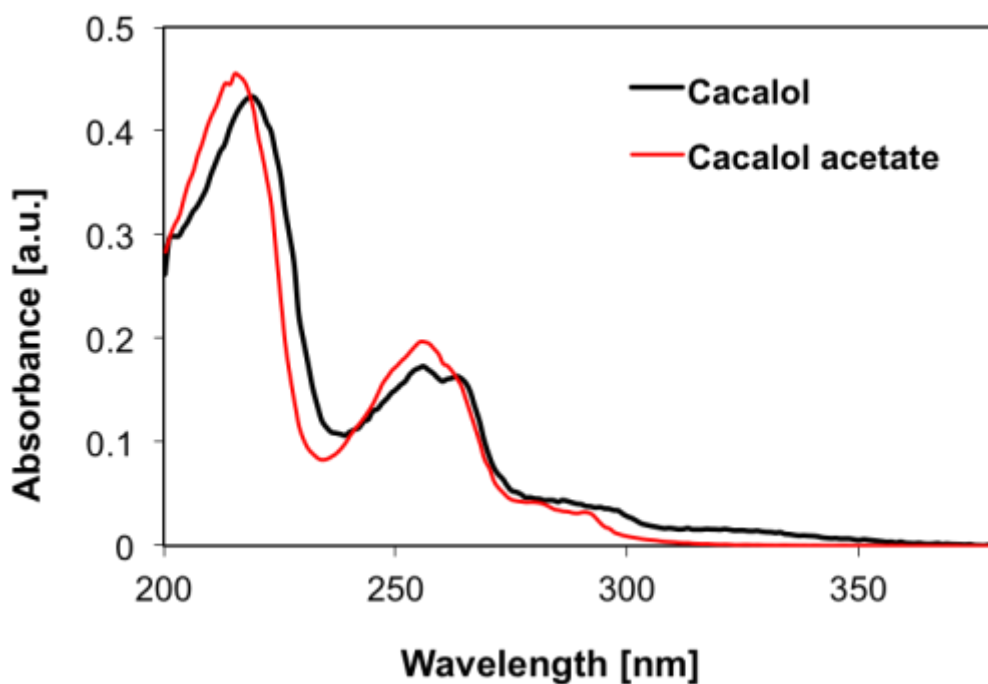

Figure A1. UV-vis spectra of Cacalol and Cacalol acetate in ethanol solution,  $[C] = 1.0 \text{ mM}$ ,  $[CA] = 1.4 \text{ mM}$

### A1.1 Quantum Yield for Production of Singlet Oxygen

The  $^1O_2$  radical quantum yield,  $\phi^1O_2$ , can be determined from the generation rate of singlet oxygen,  $R^1O_2$ , and the flux of absorbed photons,  $I_a$  [1]:

$$\phi^1O_2 = R^1O_2 / I_a$$

For determining the absolute  $^1O_2$  generation rate, the method of EPR spin-trapping with TEMP was employed. TEMP reacts with  $^1O_2$  to give the adduct TEMPO [2].

### A1.2 Flux of Absorbed Photons.

The methodology to determine  $I_a$  is described in detail by Sun and Bolton [1]. The photon flux  $I_a$  absorbed by a sample is the product of the incident photon flux  $I_o$  and the integrated absorption fraction  $F_S$  (for a sample S) over the wavelength range used in the experiment (300-800 nm) (eq.1):

$$I_a = I_o F_S \quad (1)$$

$F_S$  is given by eq. 2

$$\int_{\lambda_1}^{\lambda_2} I_{\lambda} T_{\lambda}^f f_{\lambda}^s d\lambda / \int_{\lambda_1}^{\lambda_2} I_{\lambda} T_{\lambda}^f d\lambda \quad (2)$$

where  $I_{\lambda}$  is the relative incident photon flux in the wavelength band  $d\lambda$ ,  $T_{\lambda}^f$  is the transmittance of the filter at wavelength  $\lambda$ , and

$$f_{\lambda}^s = 1 - 10^{-A_{\lambda}^s} \quad (3)$$

is the fraction of light absorbed at wavelength  $\lambda$ , where  $A_{\lambda}^s$  is the absorbance of the samples at wavelength  $\lambda$ . The integrals were determined by a sum over the wavelength range 300-800 nm.

The incident photon flux  $I_o$  can be determined by a standard actinometer method, based on the photochemical conversion of the ferrioxalate salt. Irradiation with UV-vis light causes the reduction of  $Fe^{3+}$  to  $Fe^{2+}$  (reaction 1) [3, 4]:

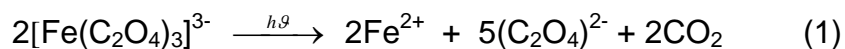

The generation rate of  $Fe^{2+}$  ions  $R_{Fe^{2+}}(M.s^{-1})$  can be determined spectrophotometrically at 510 nm after forming a complex with 1,10-phenanthroline (0.1%). The incident photon flux  $I_o$  is then obtained from eq. 4:

$$I_o = R_{Fe^{2+}} / \phi_{Fe^{2+}} F_{RS} \quad (4)$$

$\phi_{\text{Fe}^{2+}}$  is the quantum yield of  $\text{Fe}^{2+}$  generation by photochemical reaction, and  $F_{\text{RS}}$  is the integrated absorption fraction of the Ferrioxalate salt solution over the range of the wavelengths involved in the experiment. The weighted average of the quantum yield of  $\text{Fe}^{2+}$  production from  $\text{Fe}^{3+}$  salt over the bandwidth of the transmitting filter is known to be 1.0. According to our results, the formation rate of  $\text{Fe}^{2+}$  was found to be  $1.5 \times 10^{-7} \pm 0.03 \text{ M}\cdot\text{s}^{-1}$  and  $I_0$  was  $1.5 \times 10^{-7} \pm 0.03 \text{ M s}^{-1}$ . **C** and **CA** concentrations were chosen in the range where the incident light is completely absorbed (fraction  $I_a/I_0 = 1$ ). In our experiments,  $I_a$  was found to be  $1.5 \times 10^{-7} \pm 0.03 \text{ M s}^{-1}$ .

## A2. Characterization of Compounds

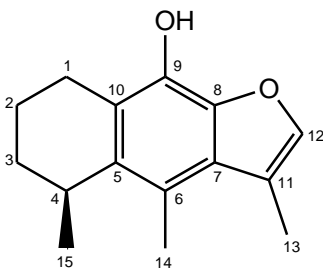

### Cacalol

mp 92-94°C,  $[\alpha]_{\text{D}}^{20} +10$ , UV  $\lambda_{\text{max}}$ : 218 ( $\epsilon$ 30400), 256 ( $\epsilon$ 10500), 264 ( $\epsilon$ 10000), 284 ( $\epsilon$ 1840)

IR (KBr): 3580, 2966, 2934, 2870, 1450  $\text{cm}^{-1}$ .

RMN  $^1\text{H}$  ( $\text{CDCl}_3$ )  $\delta$ : 1.18 (d, 3H,  $\text{CH}_3$ , C-15), 3.22 (m, 1H, C-4) 1.75–1.90 (m, 4H, C-3, C-2), 2.92 - 3.03 (m, 2H, C-1), 2.36 (d, 3H,  $\text{CH}_3$ , C-13), 2.52 (s, 3H,  $\text{CH}_3$ , C-14), 7.24 (m, 1H, C-12).

RMN  $^{13}\text{C}$  ( $\text{CDCl}_3$ )  $\delta$ : 136.4 (C-12), 117.2 (C-11), 120.2 (C-7), 118.9 (C-6), 135.6 (C-5), 29.8 (C-4), 30.2 (C-3), 16.7 (C-2), 23 (C-1), 126.2 (C-10), 142.2 (C-9), 140.8 (C-8), 11.3 (C-13), 13.8 (C-14), 21.4 (C-15).

EM (IE)  $m/z$ : 230 ( $\text{M}^+$ , 71 %), 215 ( $\text{M}^+-15$ , 100 %).

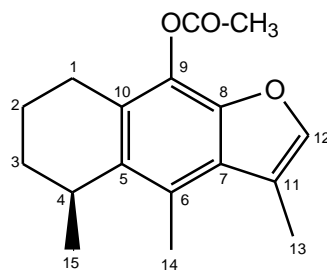

### Cacalol Acetate

mp 103-104°C;  $[\alpha]_D^{20}$  -9; UV  $\lambda_{\max}$ : 218 ( $\epsilon$ 27000), 255 ( $\epsilon$ 12000), 280 ( $\epsilon$ 2100), 292 ( $\epsilon$ 1320).

**IR (KBr):** 1760, 1630, 1600  $\text{cm}^{-1}$ .

**RMN  $^1\text{H}$  ( $\text{CDCl}_3$ )  $\delta$ :** 1.18 (d, 3H,  $\text{CH}_3$ , C-15), 3.24 (m, 1H, C-4), 1.75–1.90 (m, 4H, C-3, C-2), 2.77-2.88 (m, 2H, C-1), 2.38 (d, 3H,  $\text{CH}_3$ , C-13), 2.40 (s, 3H,  $\text{CH}_3\text{-CO}$ ), 2.56 (s, 3H,  $\text{CH}_3$ , C-14), 7.22 (m, 1H, C-12).

**RMN  $^{13}\text{C}$  ( $\text{CDCl}_3$ )  $\delta$ :** 168.6(CO-Me), 135.4 (C-8), 124.9 (C-11), 126.8 (C-7), 116.7 (C-6), 131.4 (C-5), 28.9 (C-4), 29.9 (C-3), 16.6 (C-2), 23.4 (C-1), 127.0 (C-10), 145.2 (C-9), 141.4 (C-12), 11.3 (C-13), 13.8 (C-14), 21.4 (C-15), 20.5 ( $\text{CH}_3\text{-CO}$ )

**EM (IE)  $m/z$ :** 272 ( $\text{M}^+$ , 71 %), 215 ( $\text{M}^+-15$ , 100 %).

### References

- [1] L. Sun, J.R. Bolton, *The Journal of Physical Chemistry* 100 (1996) 4127-4134.
- [2] S. Rinalducci, J.Z. Pedersen, L. Zolla, *Biochimica et Biophysica Acta (BBA) - Bioenergetics* 1608 (2004) 63-73.
- [3] A.M.M. Braun, M.-T.; Oliveros, E., *Photochemical Technology*, Wiley, Chichester (U. K.), 1991.
- [4] J.N. Demas, W.D. Bowman, E.F. Zalewski, R.A. Velapoldi, *The Journal of Physical Chemistry* 85 (1981) 2766-2771.
